# Supplementary material for: Oxygen insensitive thiol–ene photo-click chemistry for direct imprint lithography of oxides
Source: Royal Society of Chemistry journal article supplement (doi:10.1039/c8ra01688g), 2018-01-01
Supplement: c8ra01688g1.pdf [file c8ra01688g1.pdf]

## Supplementary Information

### Oxygen Insensitive Thiol–Ene Photo–Click Chemistry for Direct Imprint Lithography of Oxides

Ravikiran Nagarjuna,<sup>1</sup> Mohammad S. M. Saifullah,<sup>2</sup> Ramakrishnan Ganesan<sup>1\*</sup>

<sup>1</sup> *Department of Chemistry, Birla Institute of Technology and Science (BITS) Pilani, Hyderabad Campus, Jawahar Nagar, Shameerpet Mandal, Hyderabad-500078, India*

<sup>2</sup> *Institute of Materials Research and Engineering, A\*STAR (Agency for Science, Technology, and Research), 2 Fusionopolis Way, #08-03 Innovis, Singapore 138634, Republic of Singapore*

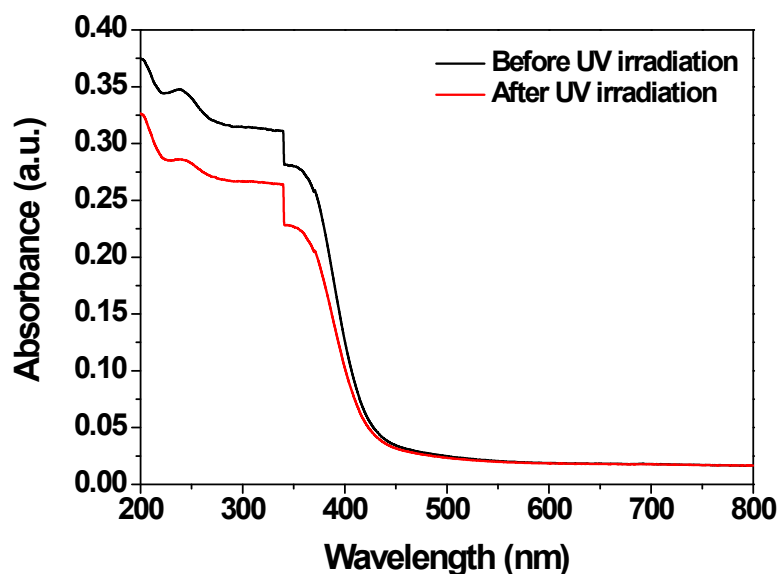

**Figure S1.** UV-visible absorbance spectra of TAP-0.5 thin film (coated over quartz substrate) before and after UV irradiation.

The UV-visible absorbance spectra of TAP-0.5 thin film before and after UV irradiation are shown in Figure S1. The film was found to be transparent in the visible region, while the absorbance gradually increased inside the UV region. After the UV exposure, the absorbance in the UV region was found to be slightly decreased, which could be attributed to the consumption of allyl double bonds.

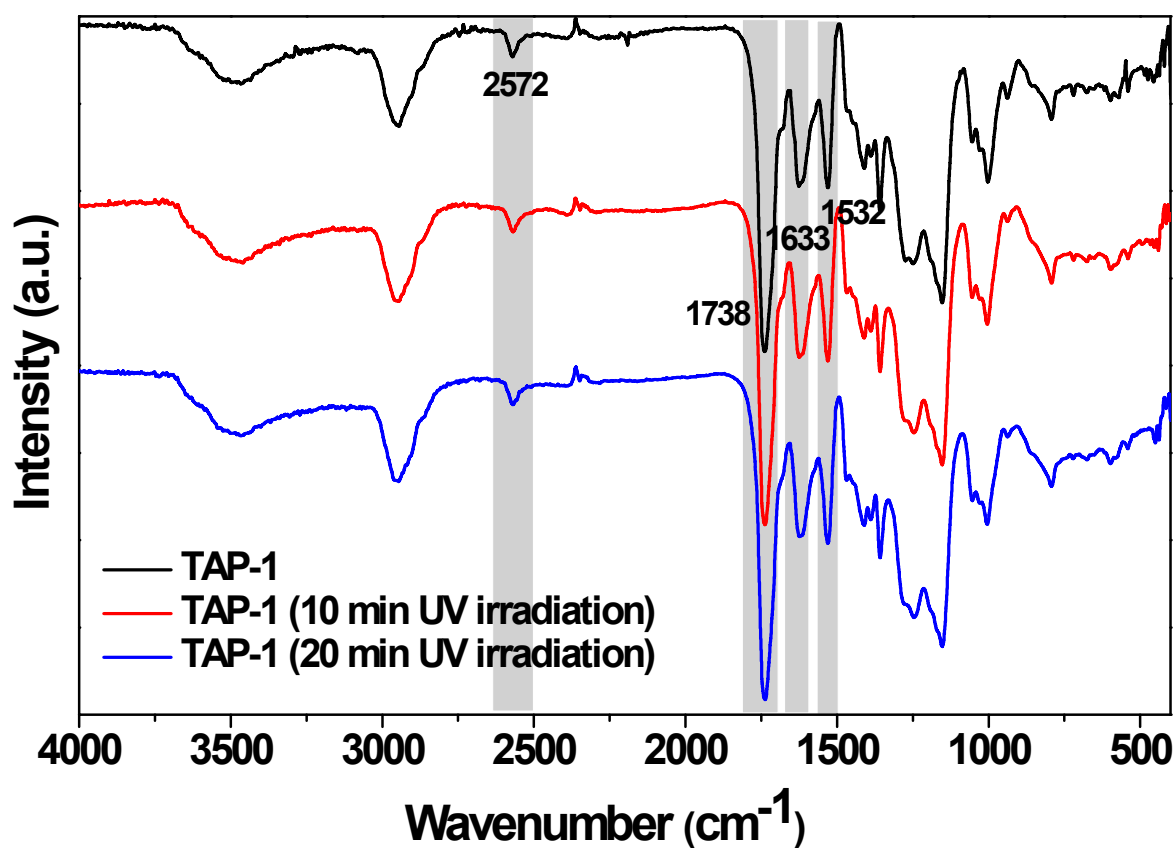

**Figure S2.** FT-IR study of thiol-ene photo-addition in the titanium-containing resin, TAP-1.0.

The FT-IR spectra of TAP-1 before and after UV irradiation are depicted in Figure S2. The presence of -SH group even after 20 min of UV exposure explains its poor performance. The FT-IR analyses therefore corroborate the poor photo-curability of stoichiometrically mixed allyl and thiol.

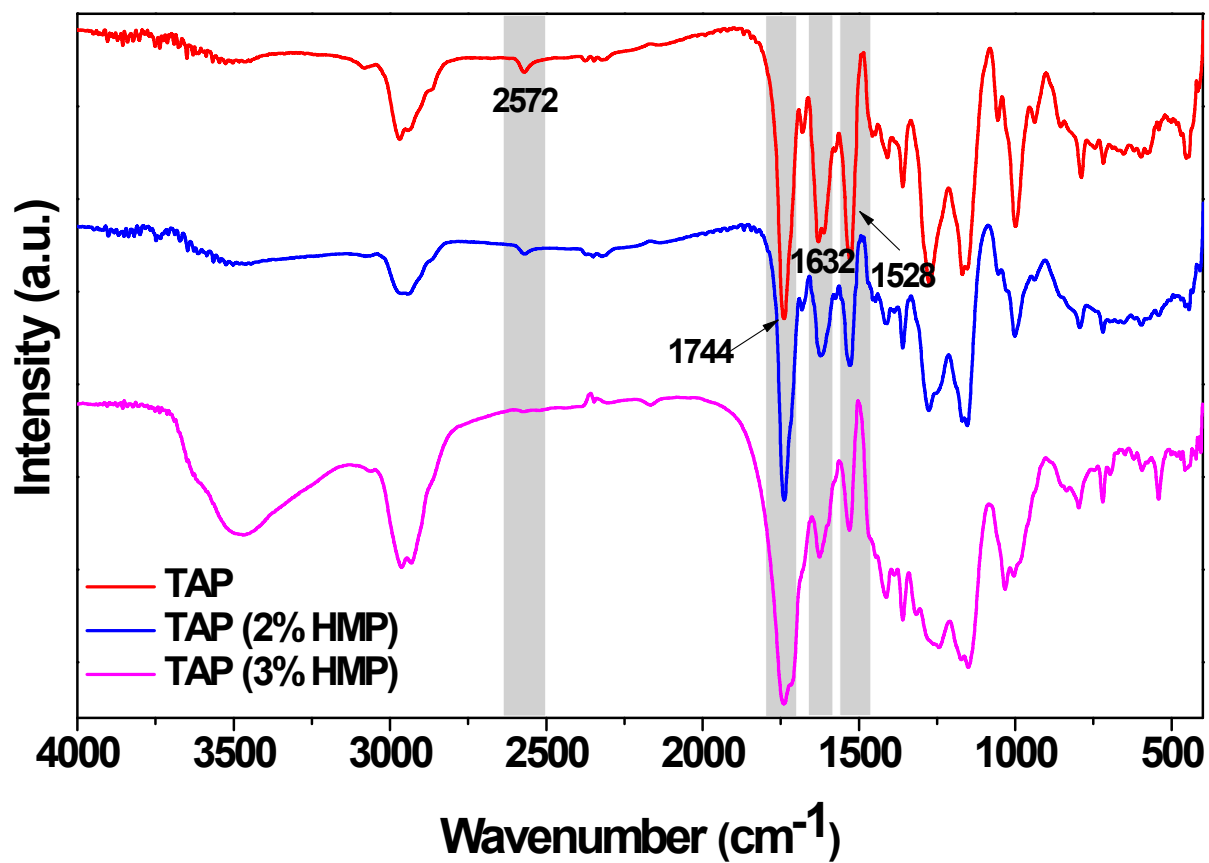

**Figure S3.** FT-IR analysis of TAP-0.5 without and with different amounts of HMP photo-initiator. The optimized loading of the photo-initiator was found to be 3%.

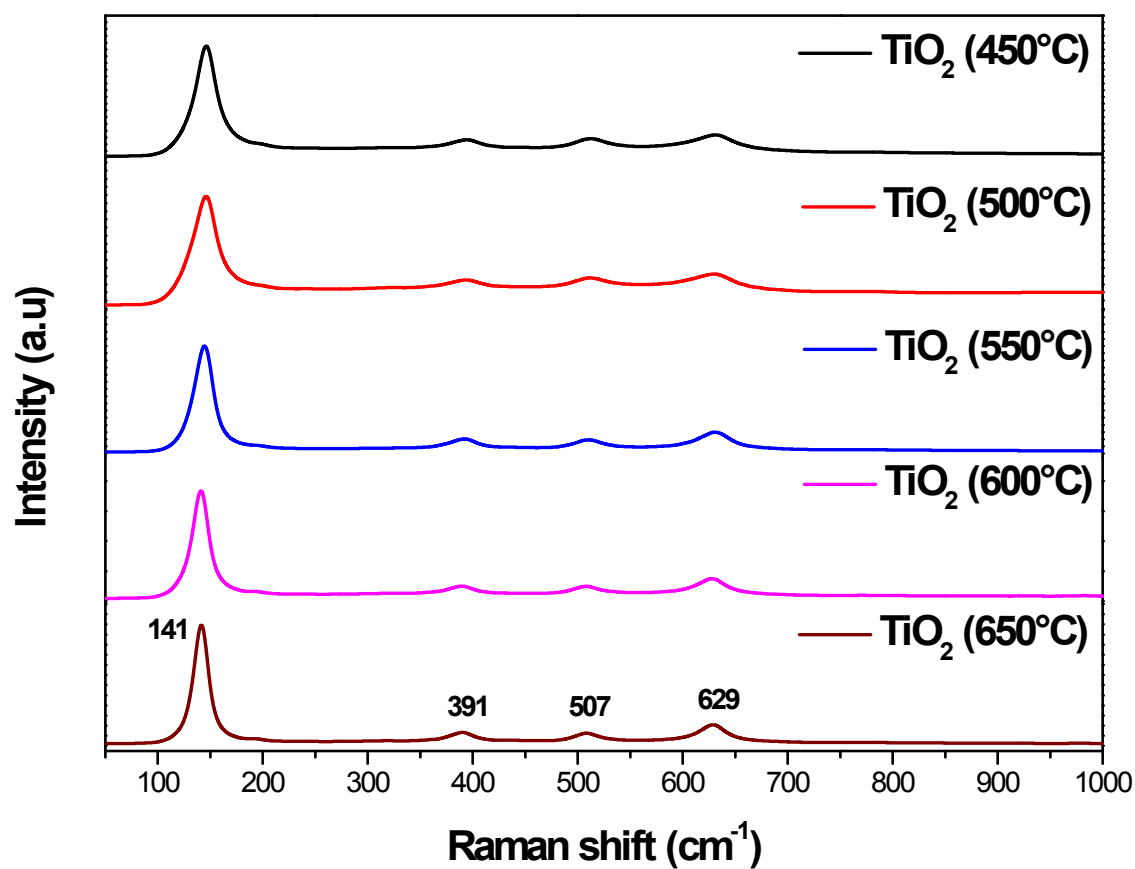

**Figure S4.** Raman spectra of  $\text{TiO}_2$  obtained by calcination of photo-cured TAP-0.5 thin films at various temperatures.

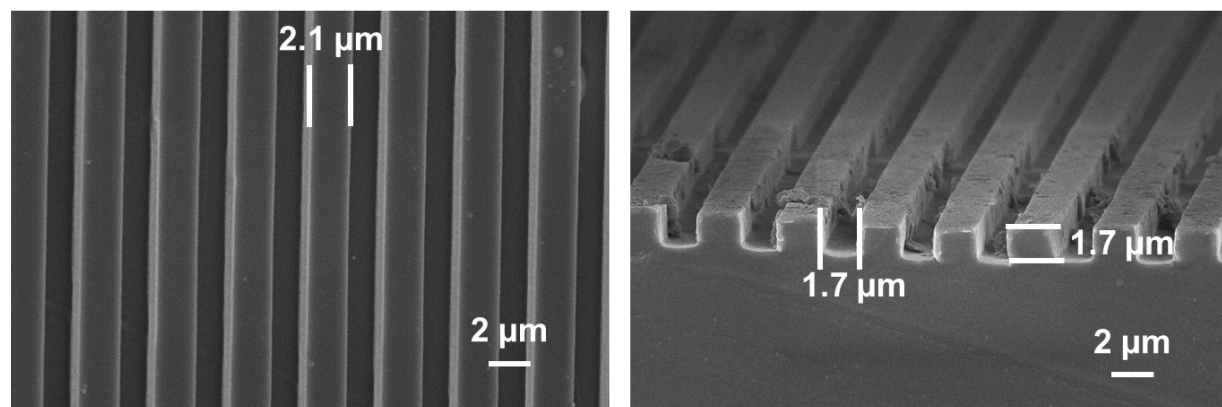

**Figure S5.** Aerial and cross-sectional views of the PDMS mold used in this study.

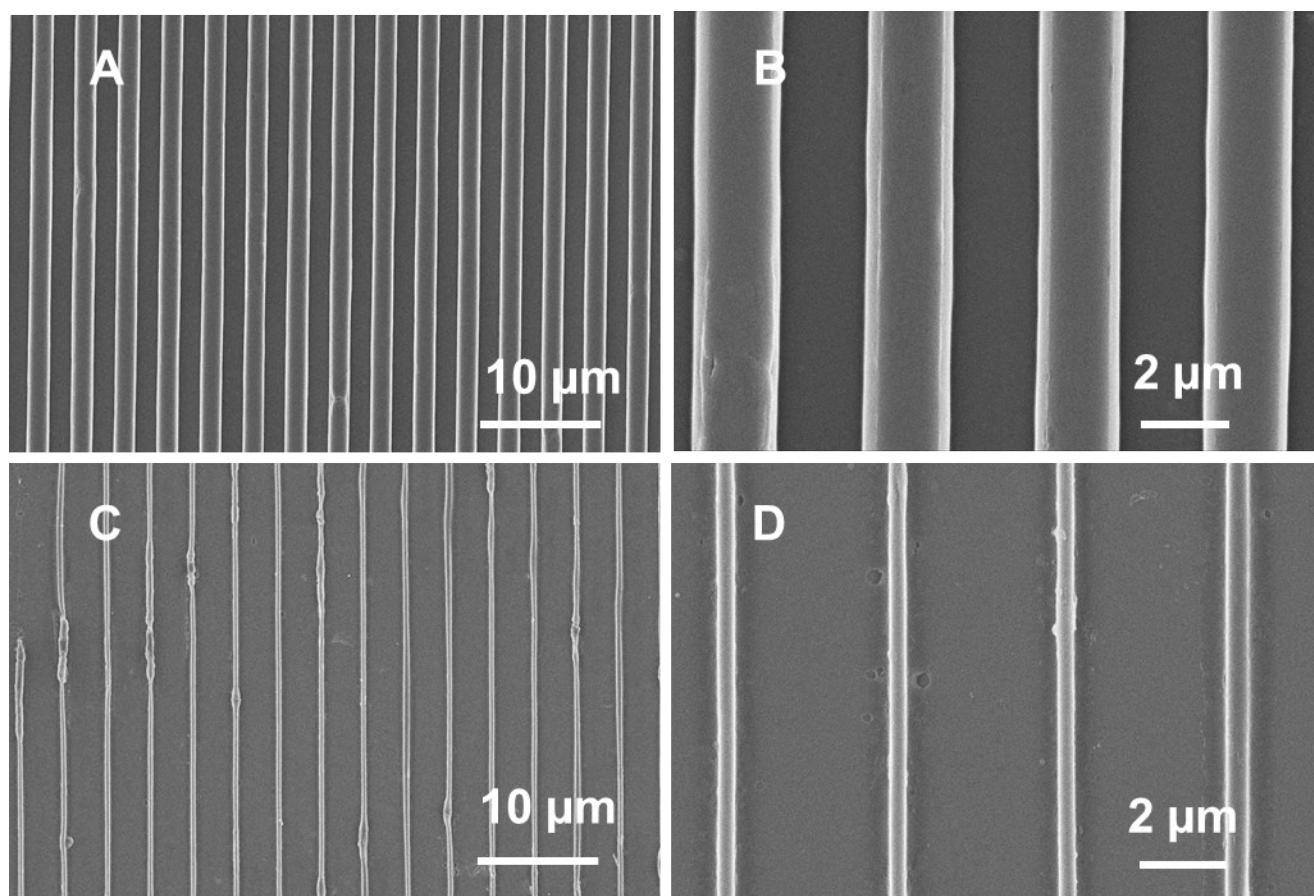

**Figure S6.** FE-SEM images of imprinted lines of  $\text{Ti}(\text{MAEAA})_4$ -based resin (A and B) before and (C and D) after calcination.

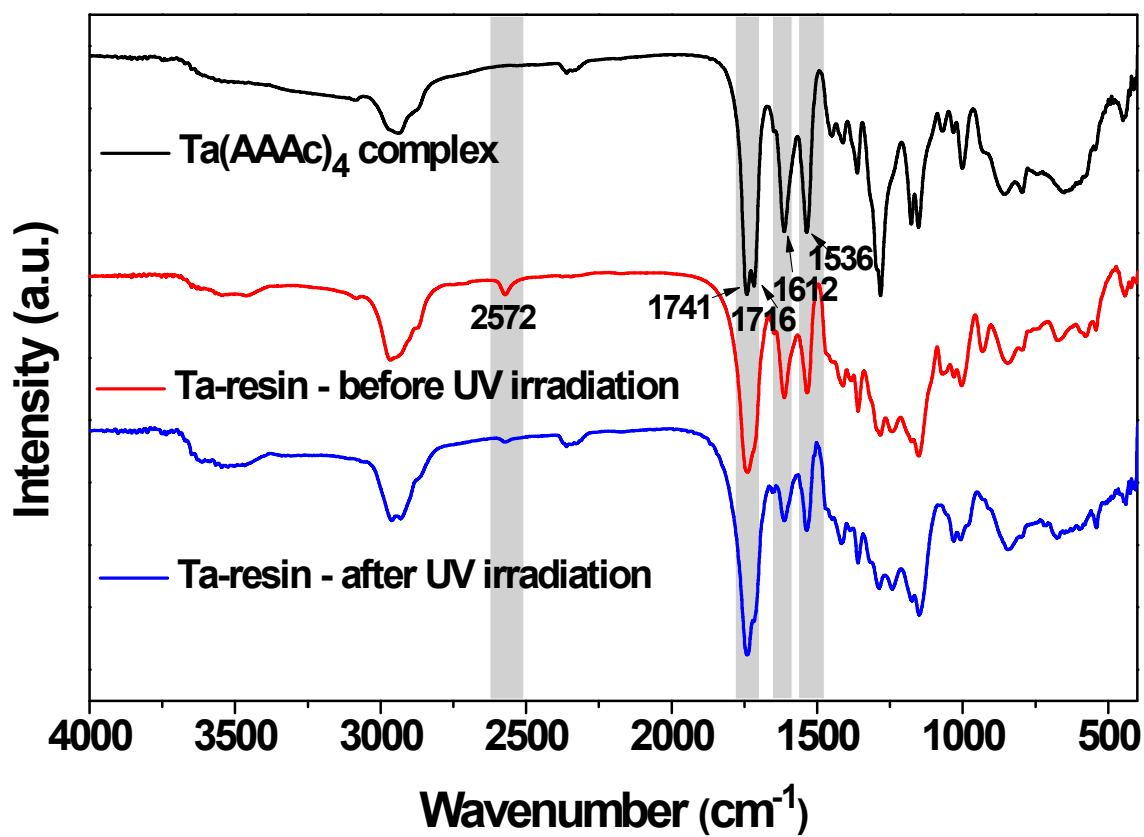

**Figure S7.** FT-IR analysis of Ta(AAac)<sub>4</sub> complex, and tantalum-containing resin before and after UV irradiation to probe the thiol-ene click reaction.
